# Supplementary material for: Effect modification by sex of genetic associations of vitamin C related metabolites in the Canadian Longitudinal Study on Aging
Source: bioRxiv or medRxiv preprint supplement (doi:10.1101/2024.04.03.24305226), 2024-04-03
Supplement: Supplementary file [file media-1.pdf]

## Supplemental Information

### Overall O-Methylascorbate GWAS Manhattan Plot

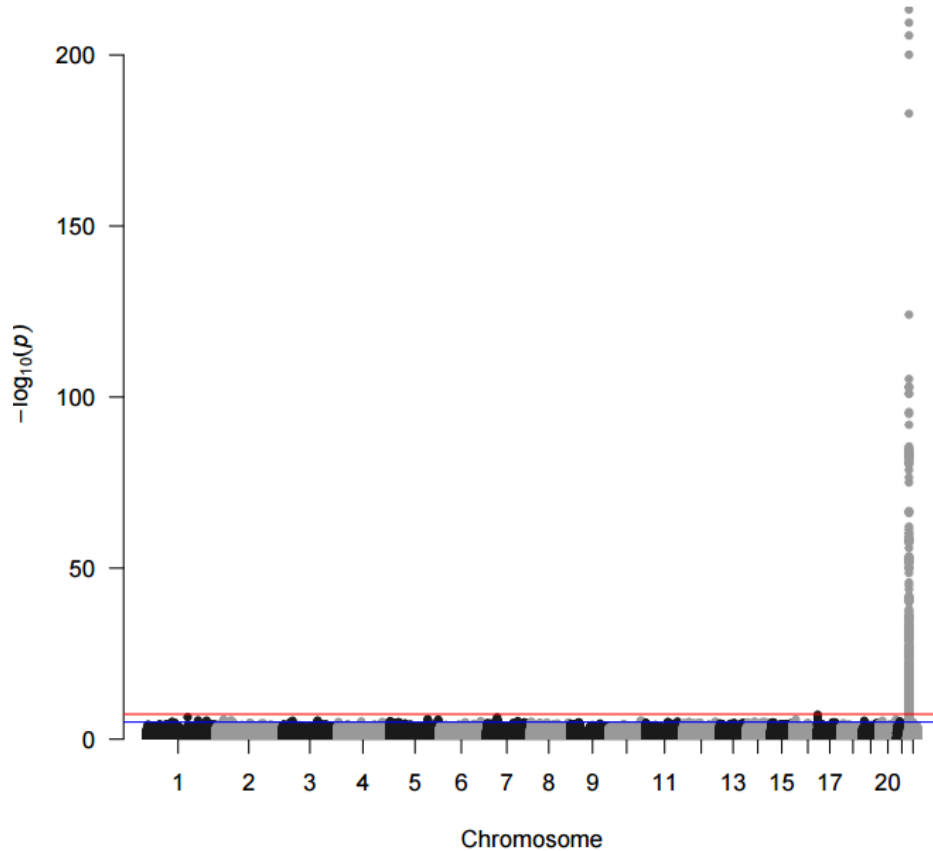

Figure S1. **O-methylascorbate** overall **results**. Results from the GWAS analysis using the FastGWA program from GCTA in the form of a Manhattan plot. GWAS conducted using a mixed linear model adjusted for age, sex, batch number, province, 10 principal components, and hours since last meal or drink which incorporated a genetic relatedness matrix to account for population stratification. Each point represents the p-value of a variant on the associated chromosome. The red line is the significant ( $5 \times 10^{-8}$ ) threshold and the blue line is the suggestive ( $1 \times 10^{-5}$ ) threshold.

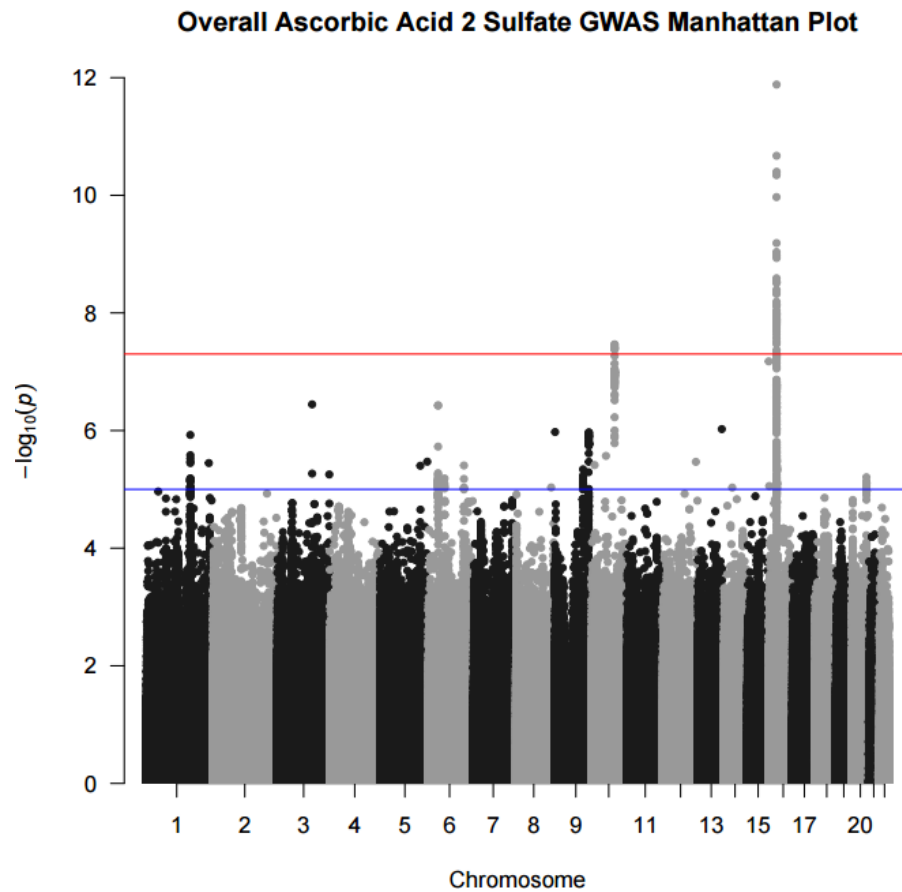

Figure S2. **Ascorbic acid 2 sulfate** overall **results**. Results from the GWAS analysis using the FastGWA program from GCTA in the form of a Manhattan plot. GWAS conducted using a mixed linear model adjusted for age, sex, batch number, province, 10 principal components, and hours since last meal or drink which incorporated a genetic relatedness matrix to account for population stratification. Each point represents the p-value of a variant on the associated chromosome. The red line is the significant ( $5 \times 10^{-8}$ ) threshold and the blue line is the suggestive ( $1 \times 10^{-5}$ ) threshold.
